# Supplementary material for: Adaptive Responses of a Peroxidase-like Polyoxometalate-Based Tri-Assembly to Bacterial Microenvironment (BME) Significantly Improved the Anti-Bacterial Effects
Source: MDPI journal article supplement (doi:10.3390/ijms24108858), 2023-05-16
Supplement: s1 [file s1]

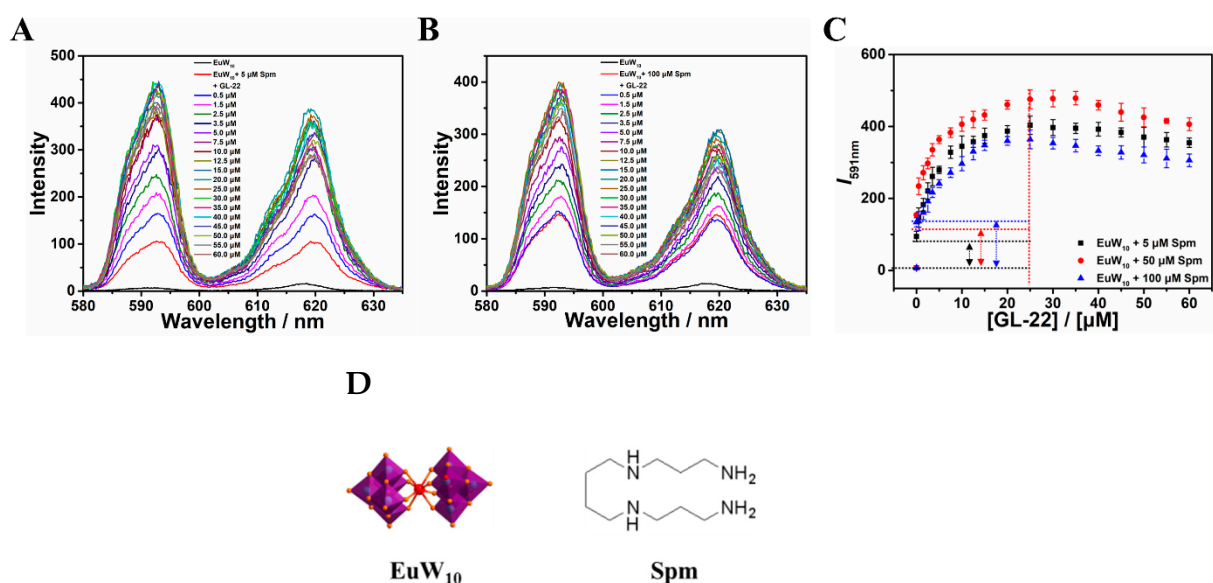

**Figure S1.** Fluorescence spectra of (A) EuW<sub>10</sub>/Spm (50 μM/5 μM), and (B) EuW<sub>10</sub>/Spm (50 μM/100 μM) assembly upon adding different amounts of GL-22 (0–60.0 μM). (C) The plots of the fluorescence intensity changes of EuW<sub>10</sub> at 591 nm upon adding different amounts of GL-22 and Spm, respectively. (D) The scheme representation of the EuW<sub>10</sub> and spermine.

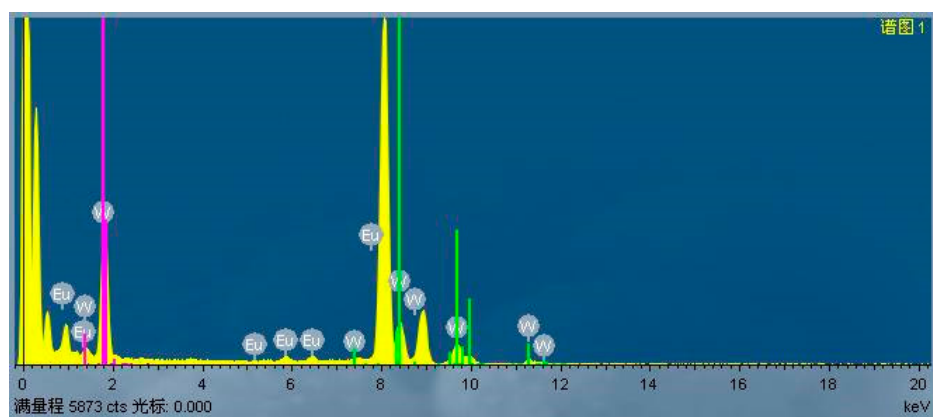

**Figure S2.** Energy dispersive spectrum of EuW<sub>10</sub>/Spm/GL-22 (50 μM/50 μM/35 μM) corresponding to Figure 3D.

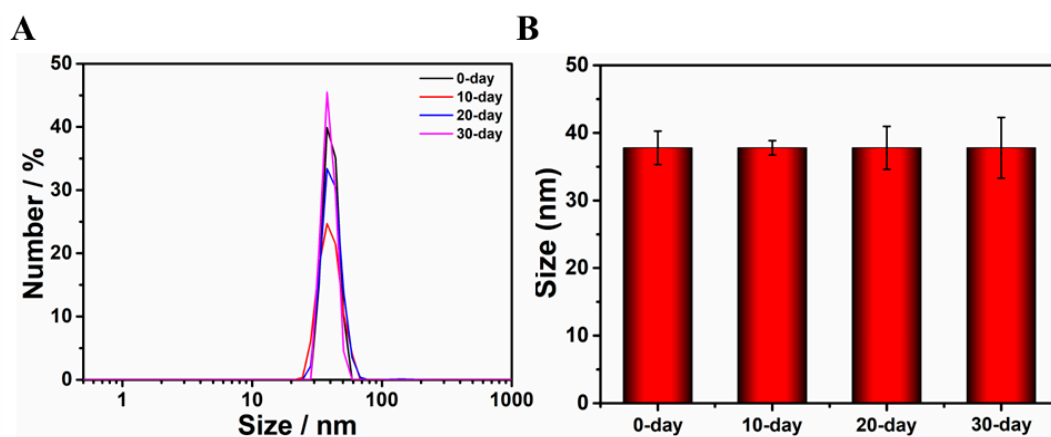

**Figure S3.** Time-dependent (A) size distributions by DLS and (B) the corresponding histogram of EuW<sub>10</sub>/Spm (50  $\mu$ M/50  $\mu$ M) in buffer solution for 30 days.

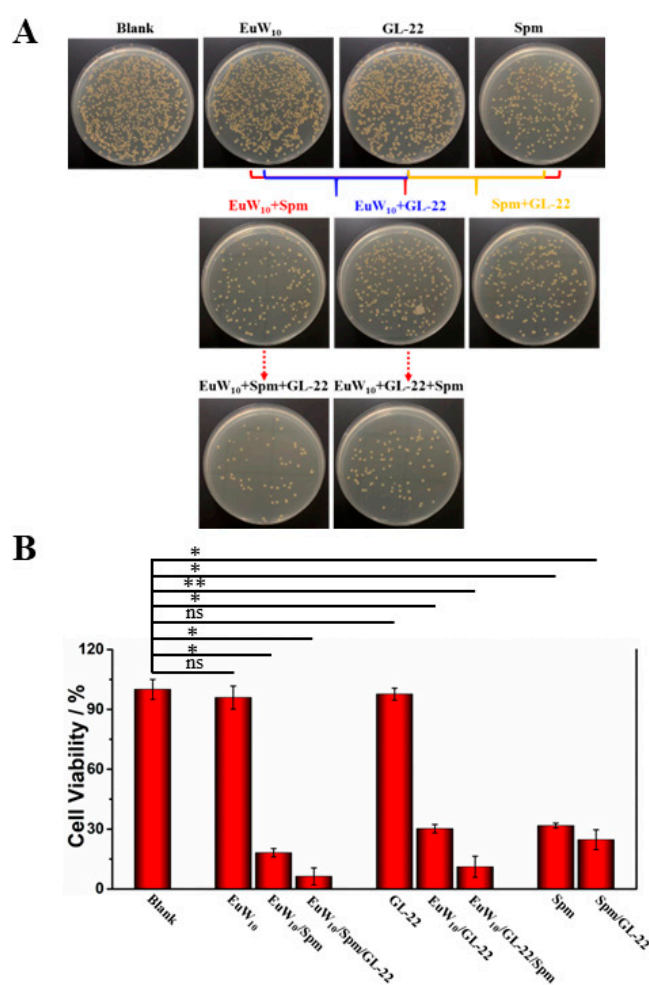

**Figure S4.** (A) Photographs and (B) statistic viability of *S. aureus* colonies cultured at 37 °C for 18 h after coating the plates (n=3). Before coating, they were treated with (I) PBS as blank

(Column 1); from up to down of (II) EuW<sub>10</sub>, EuW<sub>10</sub>/Spm, and EuW<sub>10</sub>/Spm/GL-22 (Column 2); (III) GL-22, EuW<sub>10</sub>/GL-22, and EuW<sub>10</sub>/GL-22/Spm (Column 3); (IV) Spm, and Spm/GL-22 (Column 4), for 3 h in culture medium, respectively. In all cases, the concentration of EuW<sub>10</sub>, Spm, and GL-22 is the same as 2.5  $\mu$ M, 2.5  $\mu$ M, and 1.25  $\mu$ M, respectively. Statistical significance was examined using one-way ANOVA analysis: \* $p < 0.05$ ; \*\* $p < 0.01$ ; “ns” no significance.

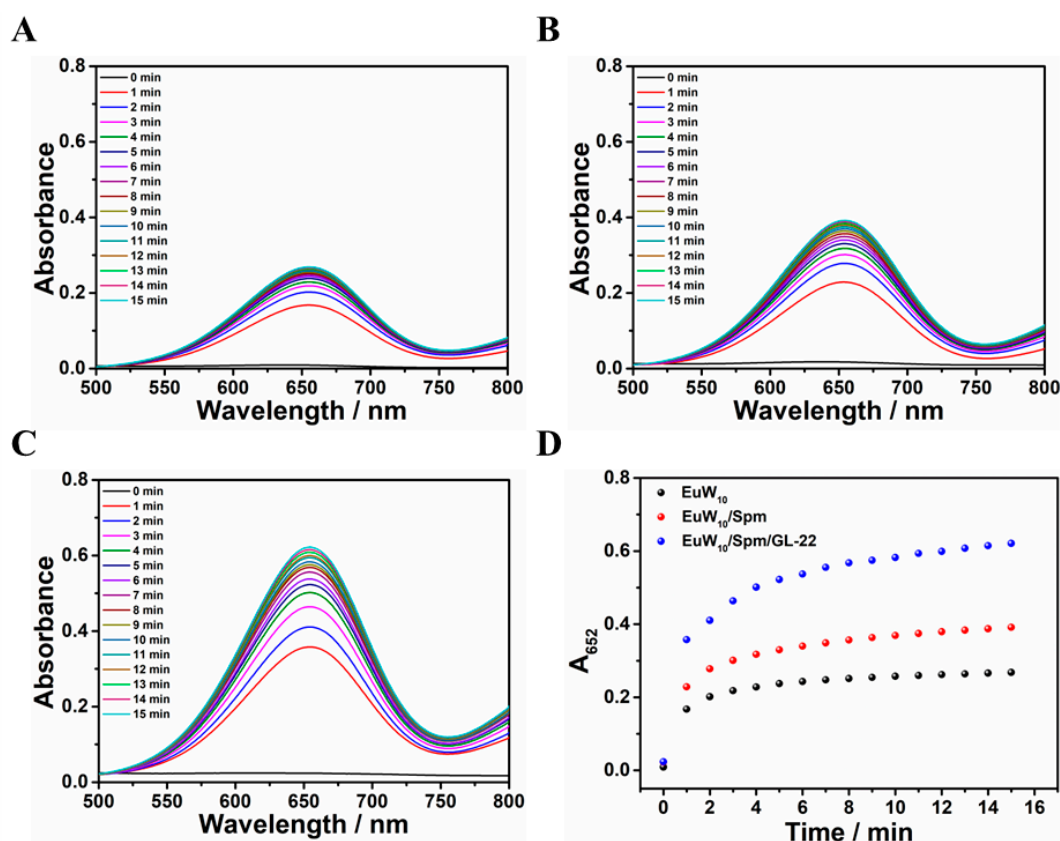

**Figure S5.** Time-dependent UV-vis absorption spectra of TMB (0.5 mM) in the presence of (A) EuW<sub>10</sub> (50  $\mu$ M); (B) EuW<sub>10</sub>/Spm (50  $\mu$ M/50  $\mu$ M); (C) EuW<sub>10</sub>/Spm/GL-22 (50  $\mu$ M/50  $\mu$ M/35  $\mu$ M). (D) The plots of corresponding intensity changes at 652 nm for (A), (B) and (C).

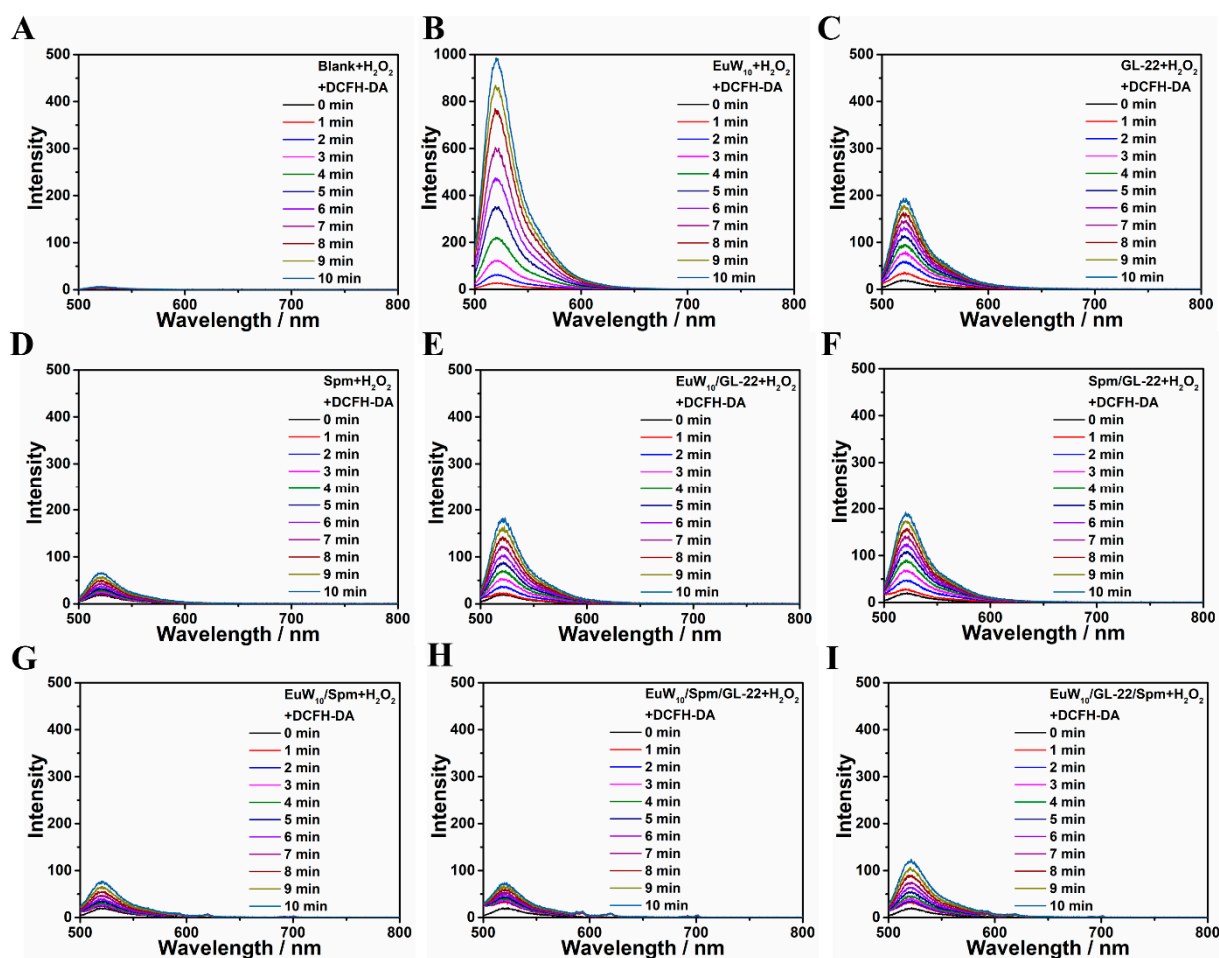

**Figure S6.** Fluorescence spectra of DCFH-DA (30  $\mu$ M) in the presence of 10.0 mM  $\text{H}_2\text{O}_2$  for (A) blank, and those of PBS/culture medium after the treatment with (B) EuW<sub>10</sub>, (C) GL-22, (D) Spm, (E) EuW<sub>10</sub>/GL-22, (F) Spm/GL-22, (G) EuW<sub>10</sub>/Spm, (H) EuW<sub>10</sub>/Spm/GL-22, (I) EuW<sub>10</sub>/GL-22/Spm, ( $\lambda_{\text{ex}} = 488$  nm). In all cases, the concentration of EuW<sub>10</sub>, Spm, and GL-22 was the same as 50  $\mu$ M, 50  $\mu$ M, and 25  $\mu$ M, respectively.

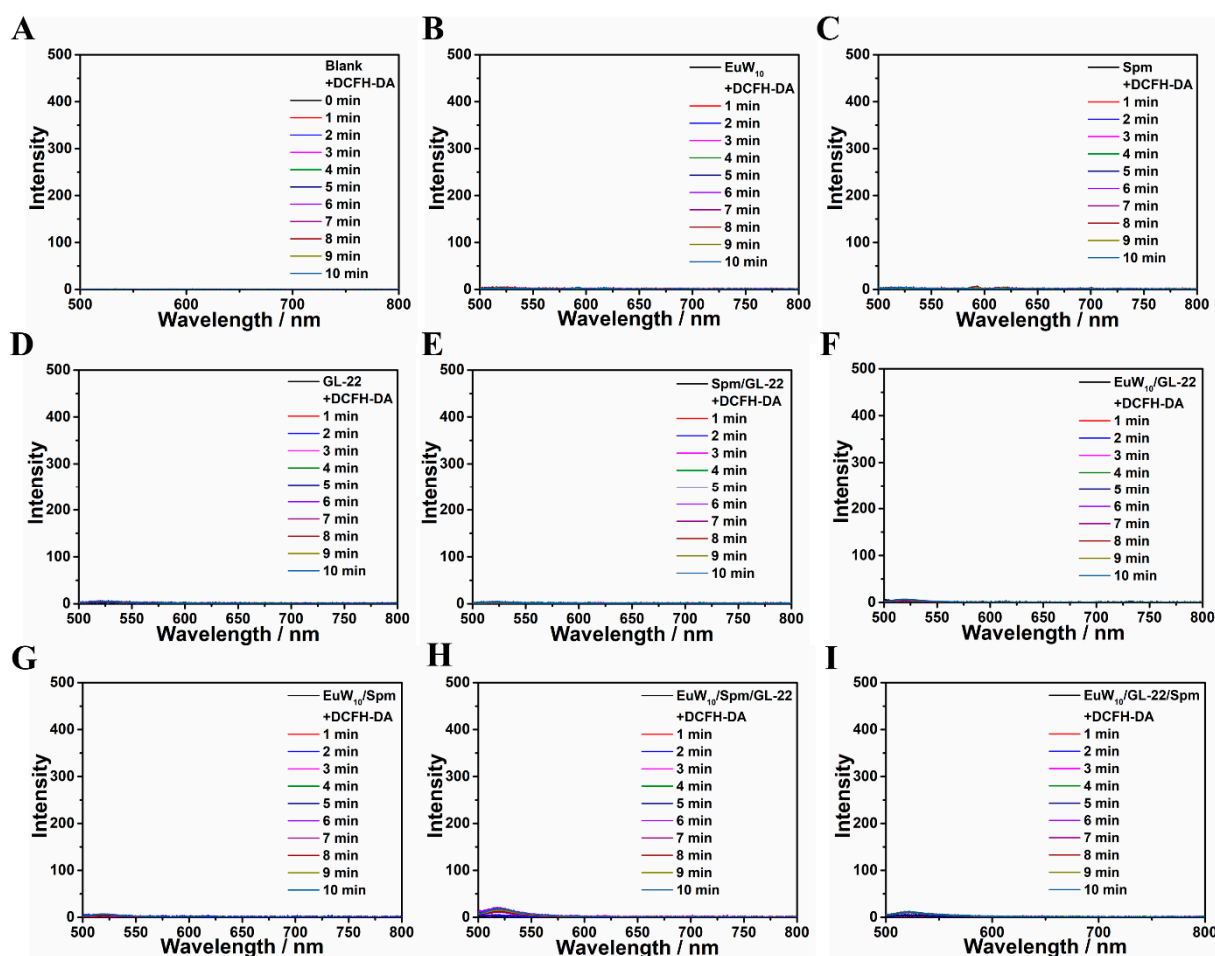

**Figure S7.** Fluorescence spectra of DCFH-DA (30  $\mu\text{M}$ ) in (A) PBS as control, and those in the presence of (B) EuW<sub>10</sub>, (C) Spm, (D) GL-22, (E) Spm/GL-22, (F) EuW<sub>10</sub>/GL-22, (G) EuW<sub>10</sub>/Spm, (H) EuW<sub>10</sub>/Spm/GL-22, (I) EuW<sub>10</sub>/GL-22/Spm in PBS, respectively ( $\lambda_{\text{ex}} = 488 \text{ nm}$ ). In all cases, the concentration of EuW<sub>10</sub>, Spm, and GL-22 was the same as 50  $\mu\text{M}$ , 50  $\mu\text{M}$ , and 25  $\mu\text{M}$ , respectively.

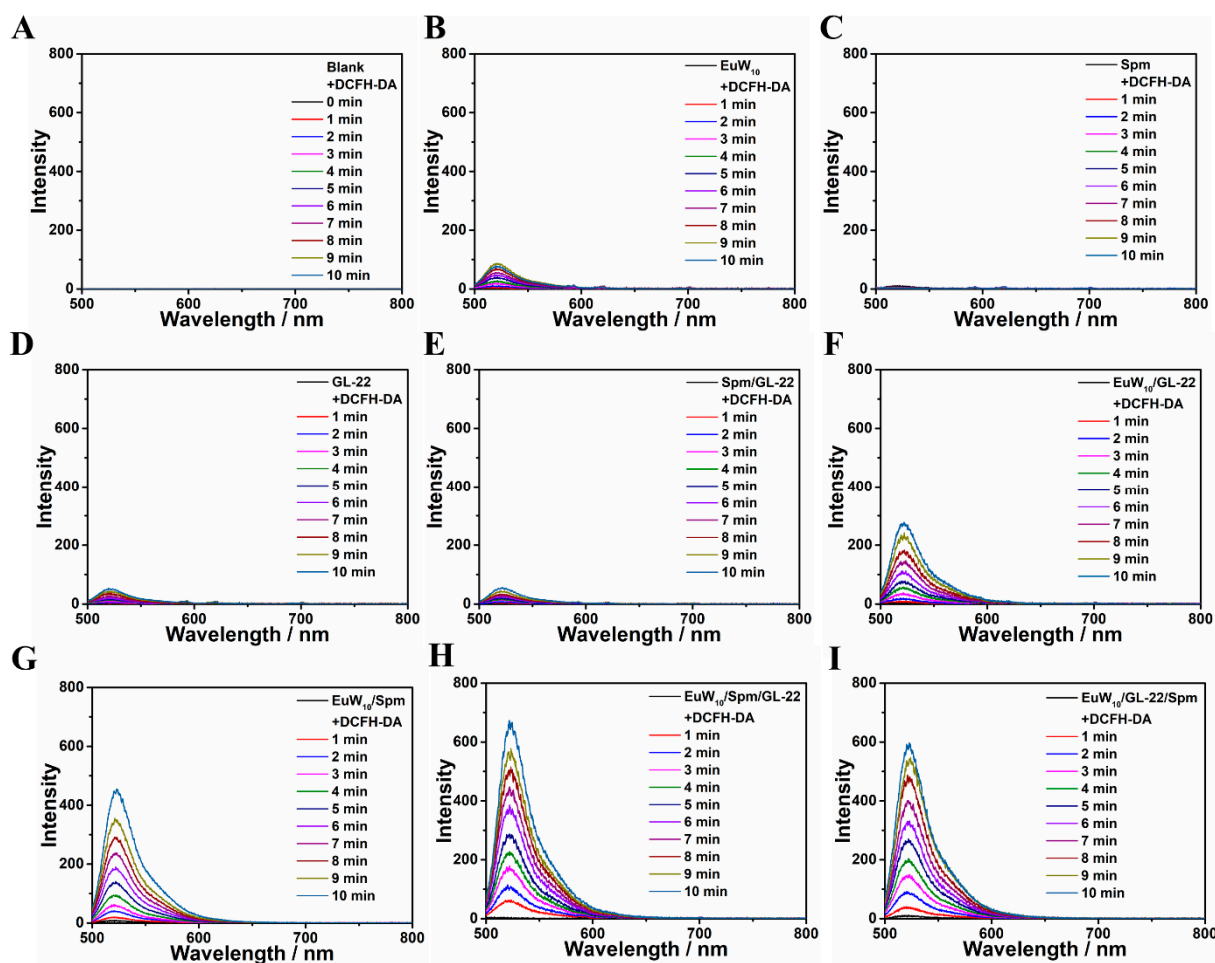

**Figure S8.** Fluorescence spectra of DCFH-DA (30  $\mu$ M) in the presence of (A) *E. coli* as control, and those of *E. coli* after the treatment with (B) EuW<sub>10</sub>, (C) Spm, (D) GL-22, (E) Spm/GL-22, (F) EuW<sub>10</sub>/GL-22, (G) EuW<sub>10</sub>/Spm, (H) EuW<sub>10</sub>/Spm/GL-22, (I) EuW<sub>10</sub>/GL-22/Spm in culture medium, respectively ( $\lambda_{\text{ex}}$  = 488 nm). In all cases, the concentration of EuW<sub>10</sub>, Spm, and GL-22 was the same as 50  $\mu$ M, 50  $\mu$ M, and 25  $\mu$ M, respectively.

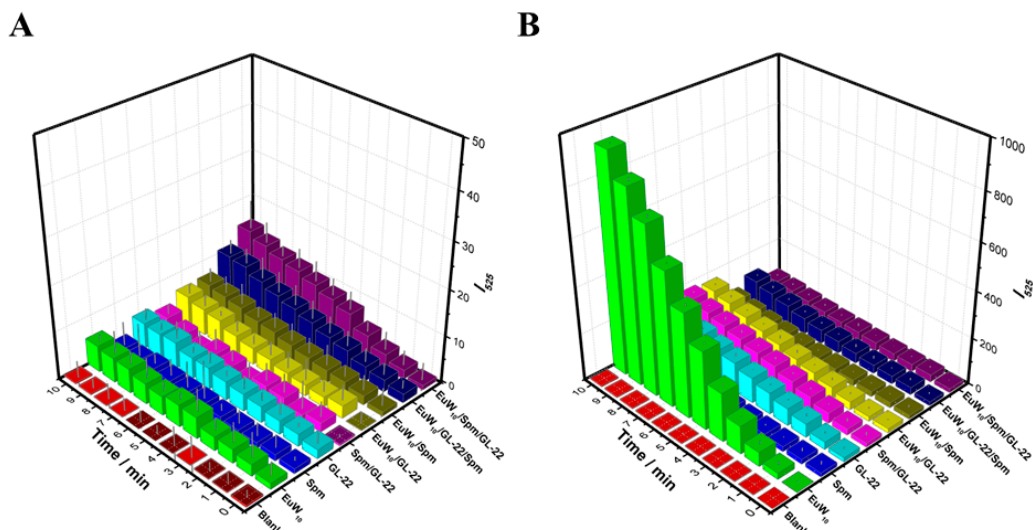

**Figure S9.** Fluorescence intensity of DCFH-DA (30  $\mu$ M) at 525 nm for blank, and those of culture medium in the (A) absence and (B) presence of 10.0 mM  $\text{H}_2\text{O}_2$ , after the treatment with EuW<sub>10</sub>, Spm, GL-22, Spm/GL-22, EuW<sub>10</sub>/GL-22, EuW<sub>10</sub>/Spm, EuW<sub>10</sub>/GL/22-Spm, EuW<sub>10</sub>/Spm/GL-22, respectively ( $\lambda_{\text{ex}} = 488$  nm). In all cases, the concentration of EuW<sub>10</sub>, Spm, and GL-22 was the same as 50  $\mu$ M, 50  $\mu$ M, and 25  $\mu$ M, respectively.

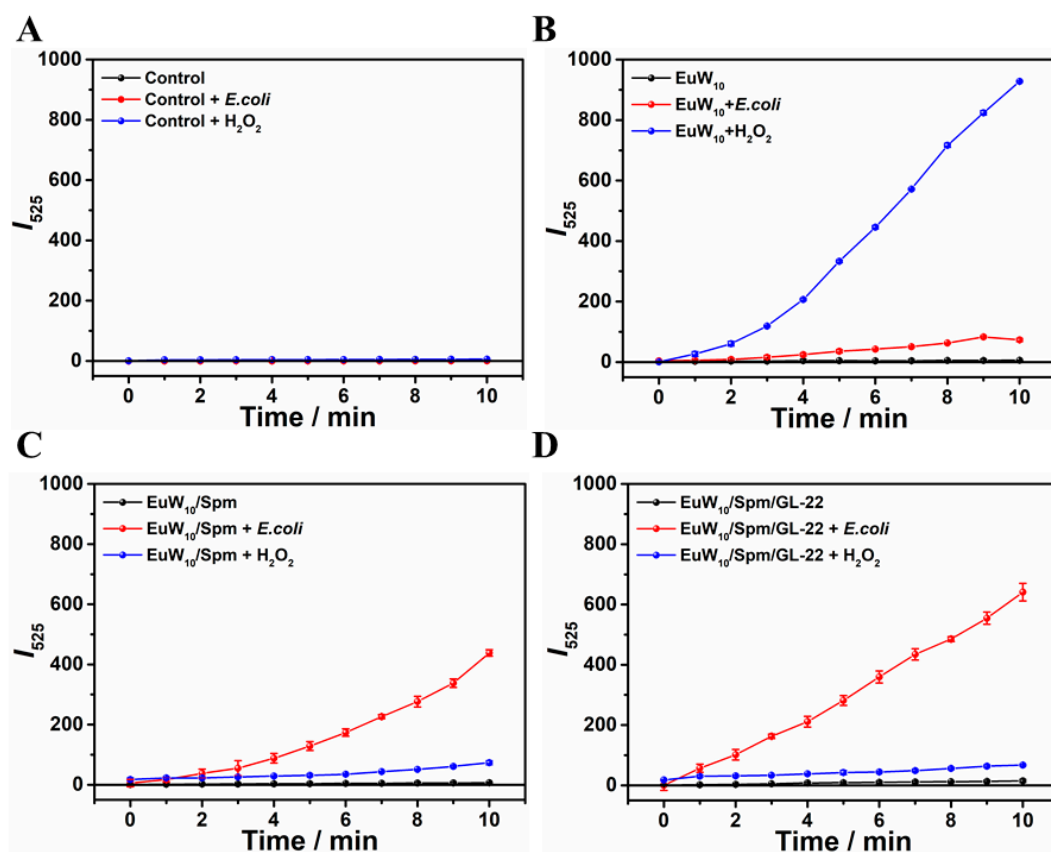

**Figure S10.** Fluorescence intensity of DCFH-DA (30  $\mu$ M) at 525 nm for (A) controls, (B) EuW<sub>10</sub>, (C) EuW<sub>10</sub>/Spm, and (D) EuW<sub>10</sub>/Spm/GL-22 before (blank) and after the treatments of *E. coli* (red) and 10.0 mM H<sub>2</sub>O<sub>2</sub> (blue), respectively ( $\lambda_{\text{ex}}$  = 488 nm). In all cases, the concentration of EuW<sub>10</sub>, Spm, and GL-22 was the same as 50  $\mu$ M, 50  $\mu$ M, and 25  $\mu$ M, respectively.

**Table S1.** Comparison of MIC results of EuW<sub>10</sub> assemblies with the reported materials.

| Bacteria         | Materials              | MIC                 | Time | Ref. |
|------------------|------------------------|---------------------|------|------|
| <i>E. coli</i>   | Date Syrup Polyphenols | 30( $\pm$ 0.83)     | 16 h | [30] |
|                  |                        | mg·mL <sup>-1</sup> |      |      |
| <i>S. aureus</i> | Date Syrup Polyphenols | 30( $\pm$ 076)      | 16 h | [30] |
|                  |                        | mg·mL <sup>-1</sup> |      |      |



|           |                                    |                                                |      |              |
|-----------|------------------------------------|------------------------------------------------|------|--------------|
| E. coli   | antimicrobial peptide P-113        | $>64 \mu\text{g}\cdot\text{mL}^{-1}$           | 16 h | [31]         |
| S. aureus | antimicrobial peptide P-113        | $32 \mu\text{g}\cdot\text{mL}^{-1}$            | 16 h | [31]         |
| S. aureus | vancomycin                         | $1 \text{ mg}\cdot\text{L}^{-1}$               | 16 h | [32]         |
| E. coli   | Cefquinome                         | $0.25 \mu\text{g}\cdot\text{mL}^{-1}$          | 72 h | [33]         |
| S. aureus | Cefquinome                         | $1 \mu\text{g}\cdot\text{mL}^{-1}$             | 72 h | [33]         |
| S. aureus | PAMAMG5 NPs                        | $8 \mu\text{g}\cdot\text{mL}^{-1}$             | 24 h | [34]         |
| E. coli   | PAMAMG5 NPs                        | $4 \mu\text{g}\cdot\text{mL}^{-1}$             | 24 h | [34]         |
| E. coli   | bamboo<br>charcoal/polyoxometalate | $0.2\text{--}2 \text{ mg}\cdot\text{mL}^{-1}$  | 18 h | [35]         |
| S. aureus | bamboo<br>charcoal/polyoxometalate | $0.02\text{--}2 \text{ mg}\cdot\text{mL}^{-1}$ | 18 h | [35]         |
| E. coli   | EuW <sub>10</sub>                  | $167.55 \mu\text{g}\cdot\text{mL}^{-1}$        | 16 h | This<br>work |
| S. aureus | EuW <sub>10</sub>                  | $251.38 \mu\text{g}\cdot\text{mL}^{-1}$        | 16 h | This<br>work |
| E. coli   | EuW <sub>10</sub> /Spm/GL-22       | $41.88 \mu\text{g}\cdot\text{mL}^{-1}$         | 16 h | This<br>work |
| S. aureus | EuW <sub>10</sub> /Spm/GL-22       | $20.94 \mu\text{g}\cdot\text{mL}^{-1}$         | 16 h | This<br>work |

Table S2. The viabilities of E-coli colonies after being treated with different assemblies, for 1–9 h.

|                        | 1 h   | 3 h   | 9 h    |                          | 1 h   | 3 h   | 9 h    |
|------------------------|-------|-------|--------|--------------------------|-------|-------|--------|
| Control                | 100   | 100   | 100.05 | Control                  | 100   | 100   | 100.05 |
| EuW <sub>10</sub>      | 99.73 | 90.26 | 57.16  | EuW <sub>10</sub>        | 99.73 | 90.26 | 57.16  |
| EuW <sub>10</sub> /Spm | 96.06 | 83.09 | 39.43  | EuW <sub>10</sub> /GL-22 | 91.67 | 80.88 | 35.14  |
| + 5 $\mu$ M GL-22      | 90.40 | 79.41 | 32.57  | + 5 $\mu$ M Spm          | 85.52 | 78.09 | 25.28  |
| + 15 $\mu$ M GL-22     | 77.67 | 54.21 | 21.65  | + 25 $\mu$ M Spm         | 61.94 | 33.16 | 0.5179 |
| + 25 $\mu$ M GL-22     | 68.07 | 48.58 | 13.26  | + 50 $\mu$ M Spm         | 65.43 | 45.78 | 5.771  |
| + 35 $\mu$ M GL-22     | 61.61 | 40.73 | 0.5090 | + 75 $\mu$ M Spm         | 70.85 | 51.47 | 10.19  |
| + 50 $\mu$ M GL-22     | 63.36 | 58.42 | 3.194  | + 100 $\mu$ M Spm        | 71.64 | 53.74 | 11.40  |
| + 70 $\mu$ M GL-22     | 74.55 | 73.93 | 8.952  |                          |       |       |        |
